# Supplementary material for: Patient and stakeholder engagement learnings: PREP-IT as a case study
Source: Atypon-hosted journal article supplement (doi:10.2217/cer-2020-0266), 2021-03-24
Supplement: prep-it collaborators_15feb2022.docx [file prep-it%20collaborators_15feb2022.docx]

***THE PREP-IT Investigators**

**Executive Committee:** Gerard P. Slobogean (Principal Investigator, University of Maryland School of Medicine, Baltimore, MD); Sheila Sprague (Principal Investigator, McMaster University, Hamilton, ON); Jeffrey Wells (Patient Representative, Trauma Survivors Network, Falls Church, VA); Mohit Bhandari (Principal Investigator, McMaster University, Hamilton, ON)

**Steering Committee:** Gerard P. Slobogean (Co-Chair, University of Maryland School of Medicine, Baltimore, MD); Mohit Bhandari (Co-Chair, McMaster University, Hamilton, ON); Sheila Sprague (Principal Investigator, McMaster University, Hamilton, ON); Jean-Claude D’Alleyrand (Walter Reed National Military Medical Center, Bethesda, MD); Anthony D. Harris (University of Maryland School of Medicine, Baltimore, MD); Daniel C. Mullins (University of Maryland, Baltimore, MD); Lehana Thabane (McMaster University, Hamilton, ON); Jeffrey Wells (Trauma Survivors Network, Falls Church, VA); Amber Wood (Association of periOperative Registered Nurses, Denver, CO)

**Adjudication Committee:** Gregory J. Della Rocca (Chair, University of Missouri, Columbia, MO); Anthony D. Harris, (University of Maryland School of Medicine, Baltimore, MD); Joan Hebden (University of Maryland School of Medicine, Baltimore, MD); Kyle J. Jeray (Greenville Health System, Greenville, SC); Lucas Marchand (University of Maryland, Baltimore, MD); Lyndsay M. O’Hara (University of Maryland School of Medicine, Baltimore, MD); Robert Zura (LSU Health, New Orleans, LA)

**Data and Safety Monitoring Committee:** Michael J. Gardner (Chair, Stanford University School of Medicine, Palo Alto, CA); Jenna Blasman (Patient Representative, Kitchener, ON); Jonah Davies (University of Washington, Seattle, WA); Stephen Liang (Washington University, St. Louis, MO); Monica Taljaard (Ottawa Hospital Research Institute, Ottawa, ON)

**Research Methodology Core:** PJ Devereaux (McMaster University, Hamilton, ON); Gordon H. Guyatt (McMaster University, Hamilton, ON); Lehana Thabane (McMaster University, Hamilton, ON); Diane Heels-Ansdell (McMaster University, Hamilton, ON)

**Patient Centred Outcomes Core:** Debra Marvel (Patient Representative, Baltimore, MD); Jana Palmer (Patient Representative, Baltimore, MD); Jeffrey Wells (Patient, Trauma Survivors Network, Falls Church, VA); Jeff Friedrich (Editor, Slate Magazine, Washington DC); Daniel C. Mullins (University of Maryland, Baltimore, MD); Nathan N. O’Hara (University of Maryland School of Medicine, Baltimore, MD); Ms. Frances Grissom (Trauma Survivor Network, Baltimore, MD)

**Orthopaedic Surgery Core:** Gregory J. Della Rocca (University of Missouri, Columbia, MO); I. Leah Gitajn (Dartmouth University, Hanover, NH); Kyle J. Jeray (Greenville Health System, Greenville, SC); Saam Morshed (San Francisco General Hospital, San Francisco, CA); Robert V. O’Toole (University of Maryland School of Medicine, Baltimore, MD); Bradley A. Petrisor (Hamilton Health Sciences, Hamilton, ON)

**Operating Room Core:** Megan Camara (R Adams Cowley Shock Trauma Center, Baltimore, MD); Franca Mossuto (Hamilton Health Sciences, Hamilton, ON)

**Infectious Disease Core:** Anthony D. Harris (University of Maryland School of Medicine, Baltimore, MD); Manjari G. Joshi (University of Maryland School of Medicine, Baltimore, MD)

**Military Core:** Jean-Claude D’Alleyrand (Walter Reed National Military Medical Center, Bethesda, MD); Justin Fowler (United States Army, USA); Jessica Rivera (San Antonio Military Medical Center, San Antonio, TX); Max Talbot (Canadian Armed Forces, Montreal, QC)

**McMaster University Methods Center** (Hamilton, ON): Sheila Sprague (Principal Investigator); Mohit Bhandari (Principal Investigator); Shannon Dodds (Research Coordinator); Alisha Garibaldi (Research Coordinator); Silvia Li (Research Coordinator); Uyen Nguyen (Research Coordinator); David Pogorzelski (Research Coordinator); Alejandra Rojas (Research Coordinator); Taryn Scott (Research Coordinator); Gina Del Fabbro (Research Assistant); Olivia Paige Szasz (Research Assistant); Diane Heels-Ansdell (Statistician); Paula McKay (Manager)

**University of Maryland School of Medicine Administrative Center** (Baltimore, MD): Gerard P. Slobogean (Principal Investigator); Nathan N. O’Hara (Manager); Andrea Howe (Project Manager); Joshua Rudnicki (Project Manager)*; Haley Demyanovich (Project Manager); Kelly Little (Financial Manager); Adam Boissonneault (Co-Investigator)

**University of Maryland School of Pharmacy, The PATIENTS Program** (Baltimore, MD): C. Daniel Mullins (Executive Director); Michelle Medeiros (Director of Research); Genevieve Polk (Assistant Director, Dissemination and Research); Eric Kettering (Senior Instructional Technology and Dissemination Specialist); Diamond Hale (Project Manager)*, Nirmen Mahal (Program Specialist)

**PREP-IT Clinical Sites:**

*Lead Clinical Site (Aqueous-PREP and PREPARE):*

**University of Maryland School of Medicine, R Adams Cowley Shock Trauma Center, Baltimore, MD**: Robert V. O'Toole, Jean-Claude D'Alleyrand, Andrew Eglseder, Aaron Johnson, Christopher Langhammer, Christopher Lebrun, Theodore Manson*, Jason Nascone, Ebrahim Paryavi*, Raymond Pensy, Andrew Pollak, Marcus Sciadini, Gerard P. Slobogean, Yasmin Degani, Haley K. Demyanovich, Andrea Howe, Nathan N. O’Hara, Katherine Joseph*, Joshua Rudnicki, Megan Camara, Lucas Marchand*, Heather Phipps, Eric Hempen

*Aqueous-PREP and PREPARE:*

**Hamilton Health Sciences – General Site, Hamilton, ON**: Brad A. Petrisor, Herman Johal, Bill Ristevski, Dale Williams, Matthew Denkers, Krishan Rajaratnam, Jamal Al-Asiri, Jordan Leonard*, Francesc A. Marcano-Fernández*, Jodi Gallant, Federico Persico*, Marko Gjorgjievski*, Annie George*, Sarah M. McGaugh*, Kaitlyn Pusztai, Sarah Piekarski, Mavis Lyons, Julia Gennaccaro

**IU Health Methodist Hospital, Indianapolis, IN:** Roman M. Natoli, Greg E. Gaski*, Todd O. McKinley, Walter W. Virkus, Anthony T. Sorkin, Jan P. Szatkowski, Joseph R. Baele*, Brian H. Mullis, Yohan Jang, Luke A. Lopas, Lauren C. Hill, Andrea Hudgins*, Courteney L. Fentz, Maricela M. Diaz, Katelyn M. Garst, Emma W. Denari

**San Antonio Military Medical Center, San Antonio, TX:** Patrick Osborn, Justin Fowler, Sarah Pierrie, Eric Martinez*, Joseph Kimmel*, Maria Herrera

**Prisma Health - Upstate, Greenville, SC**: Kyle J. Jeray, John D. Adams, Michael L. Beckish, Christopher C. Bray, Timothy R. Brown, Andrew W. Cross, Timothy Dew, Gregory K. Faucher, Richard W. Gurich Jr, David E. Lazarus, S. John Millon, M. Jason Palmer, Scott E. Porter, Thomas M. Schaller, Michael S. Sridhar, John L. Sanders, L. Edwin Rudisill, Jr, Michael J. Garitty*, Andrew S. Poole*, Michael L. Sims*, Robert M. Carlisle II*, Erin Adams Hofer*, Brandon S. Huggins*, Michael D. Hunter*, William A. Marshall*, Shea Bielby Ray*, Cory D. Smith*, Kyle M. Altman*, Julia C. Bedard, Markus F. Loeffler, Erin R. Pichiotino, Austin A. Cole, Ethan J Maltz, Wesley Parker, T. Bennett Ramsey, Alex Burnikel, Michael Colello, Russell Stewart, Jeremy Wise, M. Christian Moody, Matthew Anderson, Joshua Eskew, Benjamin Judkins, James M. Miller, Stephanie L. Tanner, Rebecca G. Snider, Christine E. Townsend*, Kayla H. Pham, Abigail Martin*, Emily Robertson*, John Wilson Sykes

**University of California, San Francisco, San Francisco, CA:** Saam Morshed, Theodore Miclau, Utku Kandemir, Meir Marmor, Amir Matityahu, R. Trigg McClellan, Eric Meinberg, David Shearer, Paul Toogood, Anthony Ding, Erin Donohoe, Jothi Murali, Ashraf El Naga, Jennifer Tangtiphaiboontana, Tigist Belaye, Eleni Berhaneselase, Alexandra Paul*, Kartik Garg*, Dmitry Pokhvashchev

*Aqueous-PREP:*

**McGovern Medical School at UTHealth Houston, Houston, TX**: Joshua L. Gary*, Stephen J Warner, John W. Munz, Andrew M. Choo, Timothy S. Achor, Milton L. “Chip” Routt, Mayank Rao*, Guillermo Pechero*, Adam Miller*, Michael Kutzler, Sterling Boutte, Ryan J. Warth

**University of Florida, Gainesville, FL:** Jennifer E. Hagen, Matthew Patrick, Richard Vlasak, Thomas Krupko, Kalia Sadasivan*, Michael Talerico, Marybeth Horodyski, Chris Koenig, Daniel Bailey*, Daniel Wentworth*, Chi Van*, Justin Schwartz*, Marissa Pazik, Elizabeth Lossada-Soto

**The CORE Institute, Phoenix, AZ**: Niloofar Dehghan, Clifford B Jones*, J Tracy Watson*, Michael McKee, Ammar Karim*, Michael Talerico*, Debra L Sietsema, Alyse Williams, Tayler Dykes

**Vanderbilt Medical Center, Nashville, TN**: William T Obremskey, Amir Alex Jahangir, Manish Sethi, Robert Boyce, Daniel J. Stinner, Phillip Mitchell, Karen Trochez, Andres Rodriguez*, Vamshi Gajari*, Elsa Rodriguez, Charles Pritchett, Natalie Hogan, A. Fidel Moreno

**Banner University Medical Center – Tucson, Tucson, AZ:** Christina Boulton, Jason Lowe, Jason Wild*, John T. Ruth, Michel Taylor*, Brad Askam, Andrea Seach, Sabina Saeed*, Hunter Culbert*, Alejandro Cruz, Thomas Knapp*, Colin Hurkett*, Maya Lowney*, Breanna Featherston, Robin Carlson, Iliana Romero, Isaac Zarif

**Wright State University, Dayton, OH**: Michael Prayson, Indresh Venkatarayappa, Brandon Horne, Jennifer Jerele, Linda Clark

**Hospital Universitari Parc Tauli, Barcelona, Spain:** Francesc Marcano-Fernández, Montsant Jornet-Gibert*, Laia Martínez-Carreres, David Martí-Garín, Jorge Serrano-Sanz,

Joel Sánchez-Fernández, Matsuyama Sanz-Molero, Alejandro Carballo, Xavier Pelfort, Francesc Acerboni-Flores, Anna Alavedra-Massana, Neus Anglada-Torres, Alexandre Berenguer, Jaume Cámara-Cabrera, Ariadna Caparros-García, Ferran Fillat-Gomà, Ruben Fuentes-López, Ramona Garcia-Rodriguez, Nuria Gimeno-Calavia, Guillem Graells-Alonso*, Marta Martínez-Álvarez, Patricia Martínez-Grau, Raúl Pellejero-García, Ona Ràfols-Perramon, Juan Manuel Peñalver, Mònica Salomó Domènech, Albert Soler-Cano, Aldo Velasco-Barrera, Christian Yela-Verdú, Mercedes Bueno-Ruiz, Estrella Sánchez-Palomino, Vito Andriola, Matilde Molina-Corbacho, Yeray Maldonado-Sotoca, Alfons Gasset-Teixidor, Jorge Blasco-Moreu, Núria Fernández-Poch, Josep Rodoreda-Puigdemasa, Arnau Verdaguer-Figuerola, Heber Enrique Cueva-Sevieri, Santiago Garcia-Gimenez

**Vall d'Hebron University Hospital, Barcelona, Spain:** Ernesto Guerra-Farfan, Jordi Tomas-Hernandez, Jordi Teixidor-Serra, Vicente Molero-Garcia, Jordi Selga-Marsa, Juan Antonio Porcel-Vazquez, Jose Vicente Andres-Peiro, Joan Minguell-Monyart, Jorge Nuñez-Camarena, Maria del Mar Villar-Casares, Jaume Mestre-Torres, Pilar Lalueza-Broto, Felipe Moreira-Borim, Yaiza Garcia-Sanchez

*PREPARE:*

**MetroHealth Medical Center, Cleveland, OH**: Nicholas M. Romeo, Heather A Vallier, Mary A Breslin*, Joanne Fraifogl, Eleanor S Wilson*, Leanne K Wadenpfuhl*, Paul G. Halliday*, Isabella Heimke*

**FRASER HEALTH AUTHORITY/Royal Columbian Hospital, New Westminster, BC:** Darius G. Viskontas, Kelly L. Apostle, Dory S. Boyer, Farhad O. Moola, Bertrand H. Perey, Trevor B. Stone, H. Michael Lemke, Mauri Zomar*, Ella Spicer, Chen “Brenda” Fan*, Kyrsten Payne

**Carolinas Medical Center, Atrium Health Musculoskeletal Institute, Charlotte, NC**: Kevin Phelps, Michael Bosse, Madhav Karunakar, Laurence Kempton, Stephen Sims, Joseph Hsu, Rachel Seymour, Christine Churchill, Claire Bartel*, Robert Miles Mayberry*, Maggie Brownrigg*, Cara Girardi*, Ada Mayfield, Juliette Sweeney, Hannah Pollock*

**Inova Fairfax Medical Campus, Falls Church, VA:** Robert A. Hymes, Cary C. Schwartzbach, Jeff E. Schulman, A. Stephen Malekzadeh, Michael A. Holzman, Greg E. Gaski, Jonathan Wills, Lolita Ramsey, James S. Ahn, Farhanaz Panjshiri*, Sharmistha Das, Antoinisha D. English, Sharon M. Haaser*, Jaslynn A. N. Cuff

**Wake Forest Baptist Health, Winston-Salem, NC:** Holly Pilson, Eben A. Carroll, Jason J. Halvorson, Sharon Babcock, J. Brett Goodman, Martha B. Holden, Debra Bullard*, Wendy Williams, Taylor Hill, Ariel Brotherton

**University of Utah, Salt Lake City, Utah**: Thomas F. Higgins, Justin M. Haller, David L. Rothberg, Lucas S. Marchand, Ashley Neese, Mark Russell*, Zachary M. Olsen, Abby V. McGowan, Sophia Hill

**Dartmouth-Hitchcock Medical Center, Lebanon, NH:**I. Leah Gitajn, Marcus Coe, Kevin Dwyer, Devin S. Mullin, Clifford A. Reilly*, Peter DePalo, Amy E. Hall, Rebecca E. Dabrowski*, Theresa A. Chockbengboun

**Massachusetts General Hospital, Boston, MA**: Marilyn Heng, Mitchel B. Harris, R. Malcolm Smith*, David W. Lhowe, John G. Esposito, Mira Bansal*, Michael McTague*, Ahmad Alnasser

**University of Mississippi Medical Center, Jackson, MS:** Patrick F. Bergin, George V. Russell, Matthew L. Graves, John Morellato, Heather K. Champion*, Leslie N. Johnson*, Sheketha L. McGee, Eldrin L. Bhanat, Josny Thimothee*, Jackie Serrano*

**University of Pennsylvania, Philadelphia, PA**: Samir Mehta, Derek Donegan, Jaimo Ahn*, Annamarie Horan, Mary Dooley, Ashley Kuczinski*, Ashley Iwu

**Sanford Health, Sioux Falls, SD**: David Potter, Robert VanDemark III, Branden Pfaff*, Troy Hollinsworth*, Kristi Atkins

**Brigham Women's Hospital, Boston, MA**: Michael J. Weaver, Arvind G. von Keudell, Elizabeth M. Allen*, Abigail E. Sagona

**University of Maryland, Capital Region Health: Largo, MD**: Todd Jaeblon, Robert Beer, Haley K. Demyanovich, Brent Bauer, Sean Meredith, Autumn Stone

**Duke University Hospital, Durham, NC:** Mark J. Gage, Rachel M. Reilly, Cindy Sparrow*, Ariana Paniagua

**University of Wisconsin Madison, Madison, WI:** Christopher M. Domes, Kristina P Johnson

**Bryan Medical Center, Lincoln, Nebraska:** Steven F. Shannon, Alesha N. Scott, Bobbi Clinch

**Cedars-Sinai Medical Center, Los Angeles, CA:** Carol A. Lin, Mark S. Vrahas, Charles N. Moon, Charles N. Moon, Geoffrey S. Marecek, Denice Dubuclet

**University of California, Irvine, Orange, CA:** John A. Scolaro, James R. Learned, Philip K. Lim, Susan Demas

**University of Cincinnati, Cincinnati, OH**: Michael J. Beltran, Michael T. Archdeacon, Henry Claude Sagi, John D. Wyrick, Theodore Toan Le, Richard T. Laughlin, Cameron G. Thomson

** Individual is no longer actively working on the Aqueous-PREP and / or PREPARE trial*
